# Supplementary material for: A cationic thorium–organic framework with triple single-crystal-to-single-crystal transformation peculiarities for ultrasensitive anion recognition
Source: Royal Society of Chemistry journal article supplement (doi:10.1039/d1sc03709a), 2021-01-01
Supplement: d1sc03709a1.pdf [file d1sc03709a1.pdf]

Supplementary Information for

**A Cationic Thorium-Organic Framework with Triple Single-Crystal-to-Single-Crystal Transformation Peculiarities for Ultrasensitive Anion Recognition**

Zi-Jian Li,<sup>‡a,c</sup> Min Lei,<sup>‡b</sup> Hongliang Bao,<sup>‡a,c</sup> Yu Ju,<sup>a,c,d</sup> Huangjie Lu,<sup>a,c</sup> Yongxin Li,<sup>e</sup> Zhi-Hui Zhang,<sup>d</sup> Xiaofeng Guo,<sup>f</sup> Yuan Qian,<sup>a,c</sup> Ming-Yang He,<sup>d</sup> Jian-Qiang Wang,<sup>\*,a,c</sup> Wei Liu,<sup>\*,b</sup> and Jian Lin<sup>\*,a,c</sup>

<sup>a</sup>Shanghai Institute of Applied Physics, Chinese Academy of Sciences, Shanghai 201800, China.  
\*wangjianqiang@sinap.ac.cn; linjian@sinap.ac.cn.

<sup>b</sup>School of Environmental and Material Engineering, Yantai University, Yantai 264005, P. R. China.  
\*wliu@ytu.edu.cn.

<sup>c</sup>University of Chinese Academy of Sciences No.19(A) Yuquan Road, Shijingshan District, Beijing, 100049, P. R. China.

<sup>d</sup>Jiangsu Key Laboratory of Advanced Catalytic Materials and Technology, Changzhou University, Changzhou 213164, China

<sup>e</sup>Division of Chemistry and Biological Chemistry, School of Physical and Mathematical Sciences, Nanyang Technological University, 637371, Singapore

<sup>f</sup>Department of Chemistry and Alexandra Navrotsky Institute for Experimental Thermodynamics, Washington State University Pullman, WA 99164-4630, USA

‡ These authors contributed equally to this work.

\* Co-corresponding authors

Email: wangjianqiang@sinap.ac.cn, wliu@ytu.edu.cn, linjian@sinap.ac.cn

### Section 1. Iodate concentration-dependent PL study.

In a typical measurement, 2 mg finely ground **Th-SINAP-200** powder was mixed with 2 mL NaIO<sub>3</sub> solutions with increasing concentrations. The mixture was treated by ultrasonication for 1 min to obtain a homogeneous suspension and stand for 30 another minutes. Then the PL spectrum was collected from 400 nm to 700 nm under 365 nm UV light irradiation. All spectra were collected for three times to obtain the average value and minimize instrumental fluctuations. The emission spectra of **Th-SINAP-200** in deionized water was also recorded using the same procedure for comparison.

**Section 2. Detection Limit Study.** In a typical measurement, 1 mg finely ground **Th-SINAP-200** powder was mixed with 2 mL NaIO<sub>3</sub> solution with a concentration of 0.5 ~ 10 mg/kg. PL spectra of **Th-SINAP-200** in different NaIO<sub>3</sub> solution were recorded using similar procedure. The detection limit was calculated using the following equations.

$$D = 3\sigma/\text{slope}$$

$$\sigma = 100 \times (I_{SE}/I_0)$$

where D is the detection limit, I<sub>SE</sub> is the standard error of the luminescence intensity measurement, which is determined by the baseline measurement of blank samples monitored at 510 nm, and I<sub>0</sub> is the measured luminescence intensity of **Th-SINAP-200** in deionized water. The slope was obtained from the linear fit of the iodate concentration-dependent luminescence intensity (monitored at 510 nm) curve in the low concentration region.

**Section 3. Selectivity Study.** For the study of selectivity toward cation, 2 mg finely ground **Th-SINAP-200** powder was mixed with 2 mL 500 mg/kg MCl<sub>X</sub>·nH<sub>2</sub>O solution (X= Na<sup>+</sup>, K<sup>+</sup>, Ba<sup>2+</sup>, Sr<sup>2+</sup>, Ca<sup>2+</sup>, Zn<sup>2+</sup>, Ni<sup>2+</sup>, Mg<sup>2+</sup>, or Al<sup>3+</sup>). For the selectivity toward the anion, 2 mg of finely ground **Th-SINAP-200** powder was mixed with 2 mL 500 mg/kg NaX·nH<sub>2</sub>O (X= F<sup>-</sup>, Cl<sup>-</sup>, NO<sub>3</sub><sup>-</sup>, HCO<sub>3</sub><sup>-</sup>, SO<sub>4</sub><sup>2-</sup>, CO<sub>3</sub><sup>2-</sup>, or BO<sub>3</sub><sup>3-</sup>) solutions. The emission spectra of **Th-SINAP-200** in deionized water was also recorded using the same procedure for comparison. All spectra were recorded for three times to minimize instrumental fluctuations and the data used for the plots was in an average value.

**Section 4. Competing Cation/Anion Exchange Study.** 20 mg of **Th-SINAP-200** powder was dispersed into 20 mL mixed solution containing 5 mg/kg  $\text{Cr}_2\text{O}_7^{2-}$  and 5 mg/kg  $\text{Sr}^{2+}$ . The mixture was stirred for different contact times (0, 1, 3, 10, 30, 40, 50, 60, 90, and 120 min). The resulting solutions were filtered with 0.22  $\mu\text{m}$  nylon membrane filters, and the Cr and Sr concentrations were determined by ICP-MS (Agilent 7800).

**Section 5. Iodate Adsorption Kinetic Study.** The iodate adsorption kinetic study was carried out at room temperature and the solid/liquid ratio was 1 g/kg. 50 mg of **Th-SINAP-200** powder was dispersed into 50 mL  $\text{NaIO}_3$  solution with an initial concentration of 10 ppm. The mixture was then stirred for certain time (0, 1, 3, 10, 30, 90, 180, and 300 min). The solution was filtered with a 0.22  $\mu\text{m}$  nylon membrane filter, and the iodate concentration was determined by ICP-MS. The removal ratios (R) of iodine were calculated using the equation of  $R = (C_0 - C_t)/C_0 \times 100\%$  (where  $C_0$  and  $C_t$  represent the initial concentration and concentration at time  $t$ , respectively). Sorption kinetics was fitted to a pseudo-second-order kinetics model,  $t/q_t = 1/h + t/q_e$  (where  $q_t$ ,  $q_e$  represent the amounts of adsorbate at certain time  $t$  or at equilibrium time,  $h$  is the initial adsorption rate,  $h = kq_e^2$ , and  $k$  is the rate constant).

**Section 6. Iodate Adsorption Isotherm Study.** Isotherm study was carried out at room temperature, and the solid/liquid ratio was 1g/L. 10 mg of **Th-SINAP-200** crystal was dispersed into 10 mL  $\text{NaIO}_3$  solution with the concentration range from 0 to 600 ppm. Then the mixture was stirred for 24 h and was filtered with a 0.22  $\mu\text{m}$  nylon membrane filter. The iodate concentration was determined by ICP-MS. The Langmuir isotherm model was fitted to interpret the experimental data and is expressed as followed:

$$\frac{C_e}{q_e} = \frac{1}{q_m k_L} + \frac{C_e}{q_m}$$

Where  $q_m$  is the maximum sorption capacity corresponding to complete monolayer coverage (mg/g) and  $k_L$  is a constant indirectly related to sorption capacity and energy of sorption (L/mg), which characterizes the affinity of the adsorbate with the adsorbent.

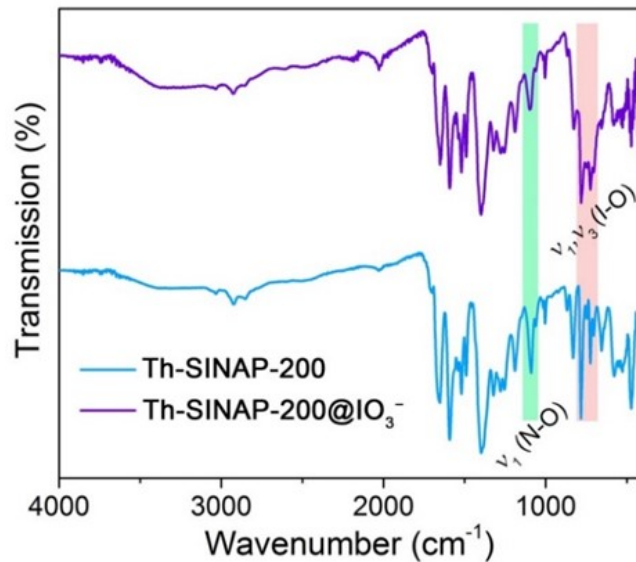

**Fig. S1** FTIR spectra of **Th-SINAP-200** (a) before and (b) after soaking in  $\text{NaIO}_3$  solution.

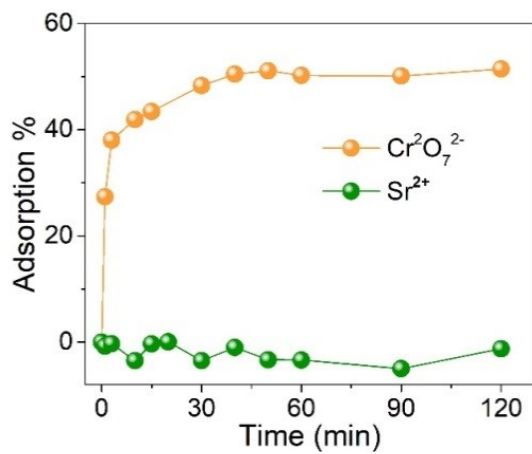

**Fig. S2** Competing cation/anion exchange study ( $\text{Sr}^{2+}$  vs.  $\text{Cr}_2\text{O}_7^{2-}$ ), showing rapid  $\text{Cr}_2\text{O}_7^{2-}$  uptake and approximately unchanged concentration of  $\text{Sr}^{2+}$  upon addition of **Th-SINAP-200**.

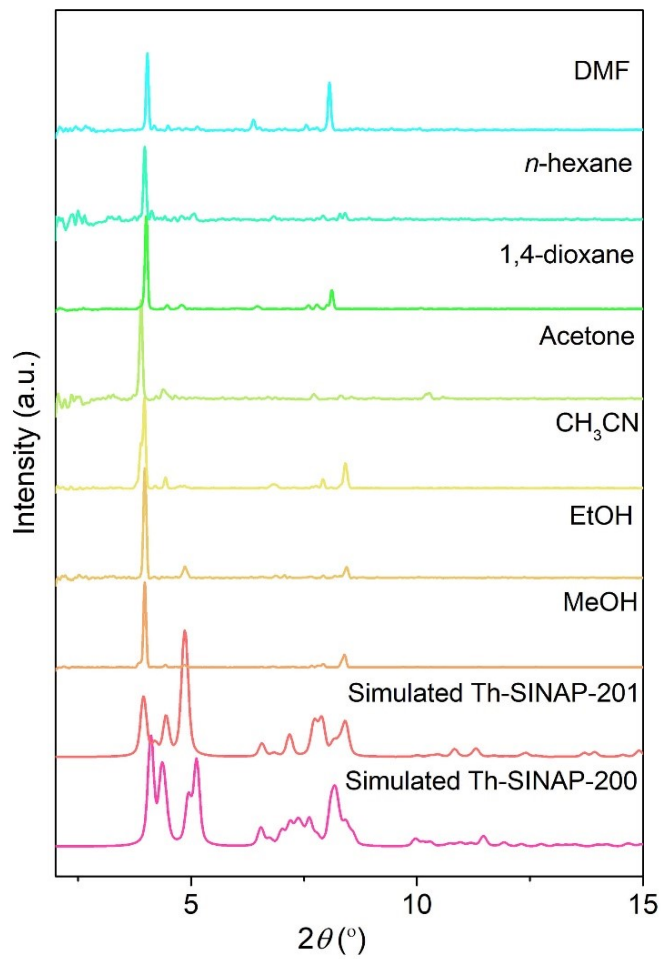

**Fig. S3** PXRD patterns of Th-SINAP-200 after soaking in different organic solvents.

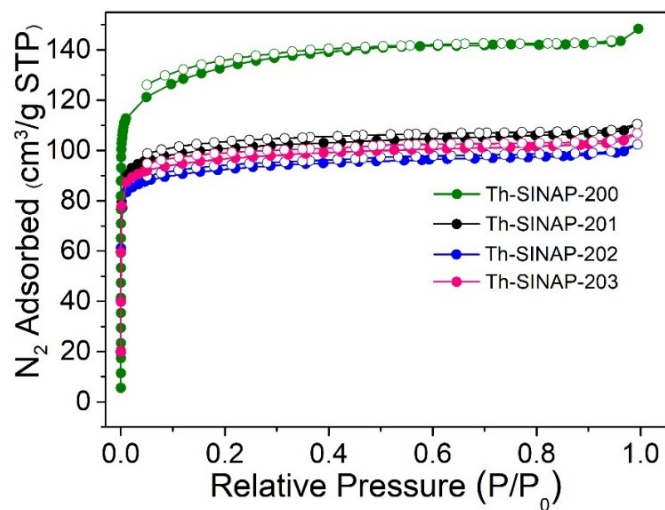

**Fig. S4** N<sub>2</sub> sorption (filled symbols) and desorption (open symbols) isotherms of **Th-SINAP-200**, **201**, **202**, and **203**.

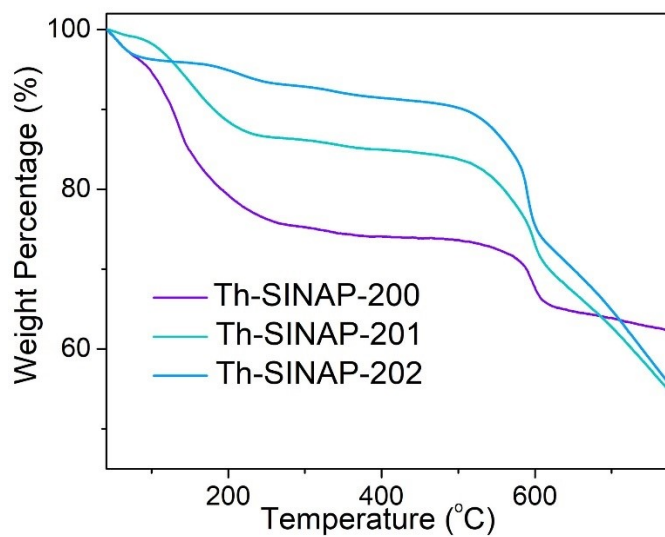

**Fig. S5** TGA curves of **Th-SINAP-200**, **Th-SINAP-201**, and **Th-SINAP-202**.

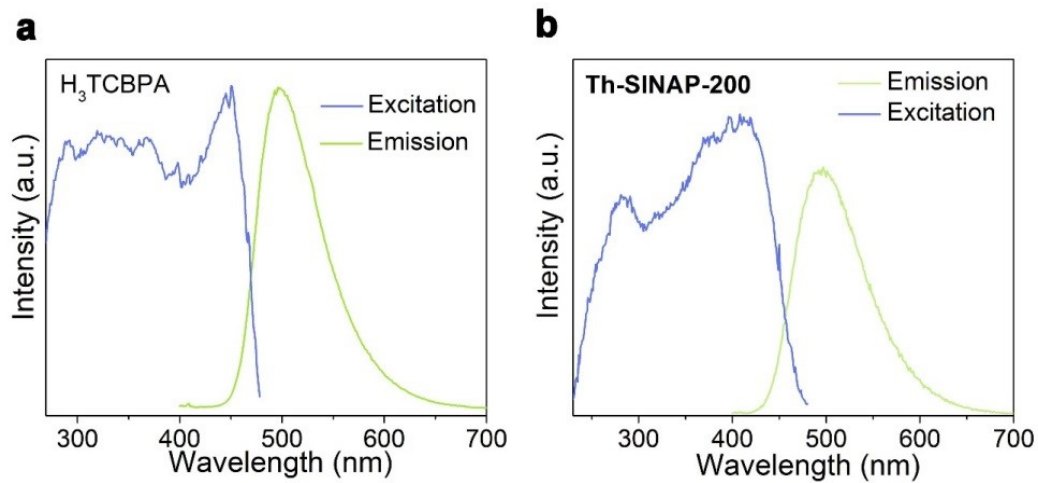

**Fig. S6** Excitation and emission ( $\lambda_{\text{exc}} = 365 \text{ nm}$ ) spectra of (a) **Th-SINAP-200** and (b) **H<sub>3</sub>TCBPA**.

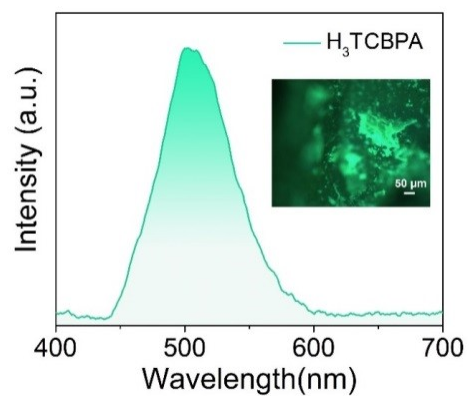

**Fig. S7** Solid-state PL spectrum and optical micrographs of **H<sub>3</sub>TCBPA** under 365 nm UV excitation.

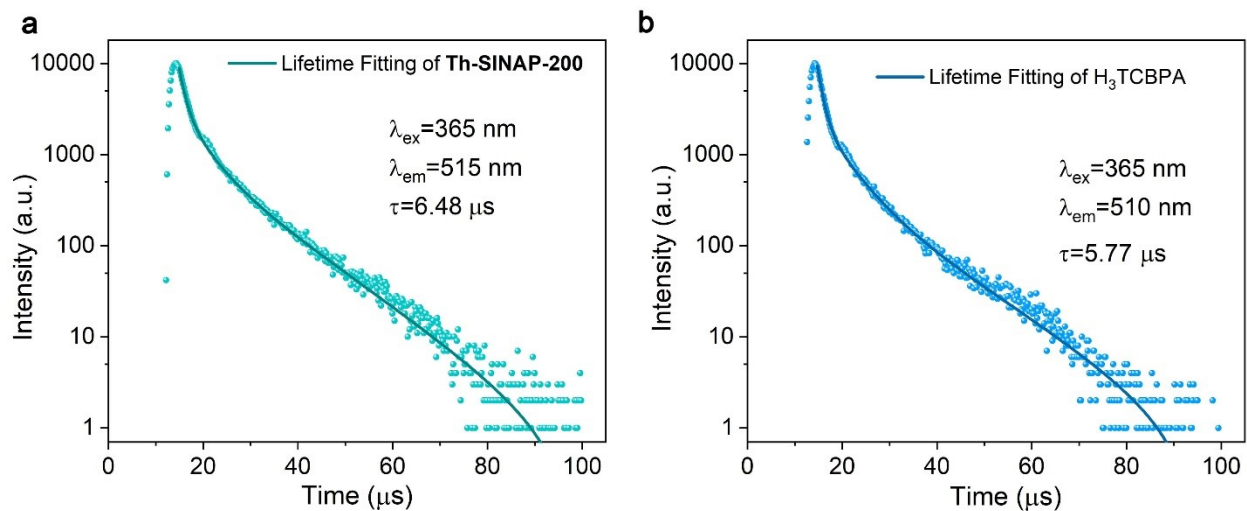

**Fig. S8** PL lifetimes of (a) **Th-SINAP-200** and (b) **H<sub>3</sub>TCBPA**.

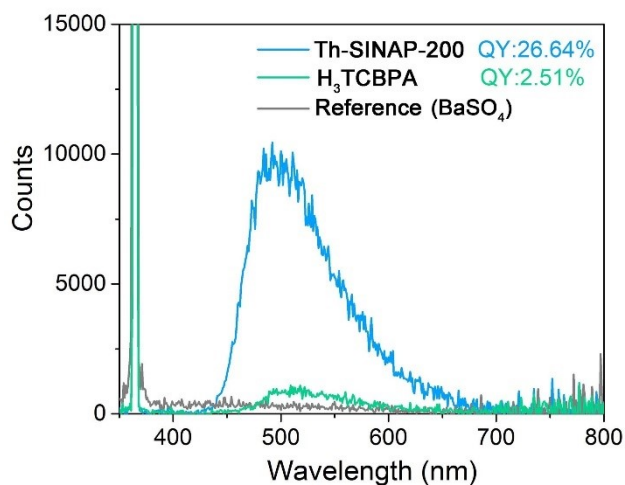

**Fig. S9** Excitation line of reference sample (**BaSO<sub>4</sub>**), excitation line and emission spectra of **Th-SINAP-200**, and excitation line and emission spectra of **H<sub>3</sub>TCBPA**. Quantum yields of **Th-SINAP-200** and **H<sub>3</sub>TCBPA** were calculated to be 26.64% and 2.51%, respectively.



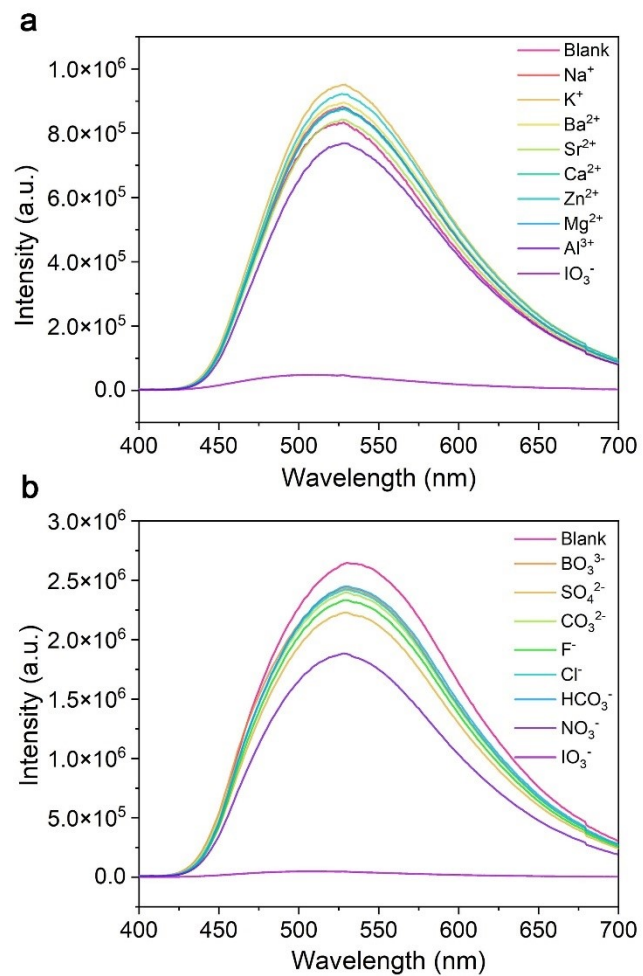

**Fig. S10** PL spectra of Th-SINAP-200 immersed in different (a) cation and (b) anion containing solutions.

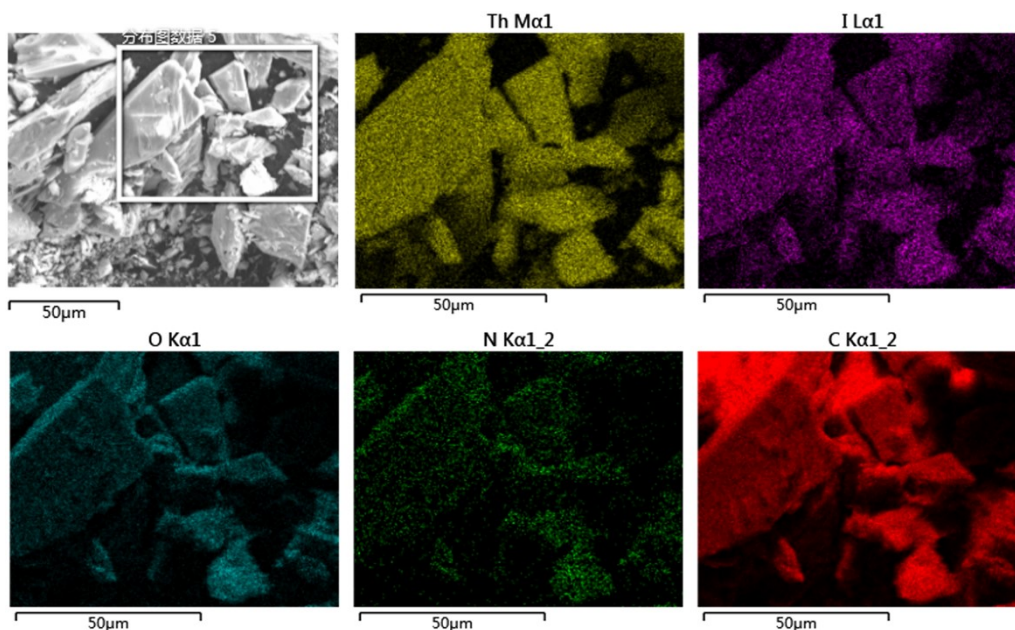

**Fig. S11** SEM-EDS mapping of Th-SINAP-200 after immersion in NaIO<sub>3</sub> solution for half an hour.

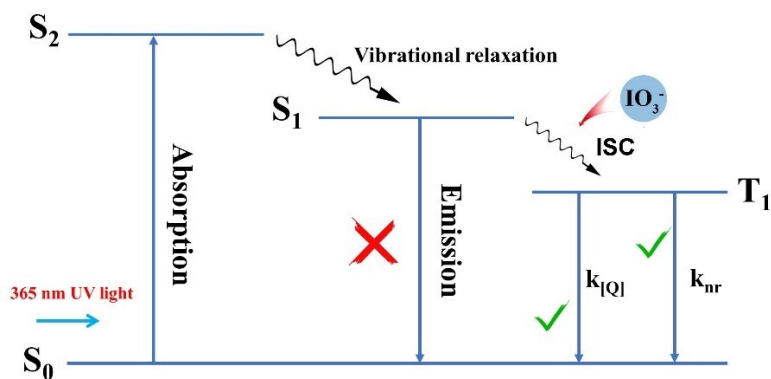

**Fig. S12** The electronic transition levels of TCPBA<sup>3-</sup> and the proposed quenching mechanism. S<sub>0</sub>= ground state, S<sub>2</sub>= ground state, S<sub>1</sub>= ground state, ISC= intersystem crossing, T<sub>1</sub>= triplet excited state, k<sub>[Q]</sub>= IO<sub>3</sub><sup>-</sup> or other quencher induced quenching constant, and k<sub>[nr]</sub>= non-radiative decay constant.

**Table S1** Crystallographic data for **Th-SINAP-200**, **201**, **202**, and **203**.

| Code                                                                                 | <b>Th-SINAP-200</b>                                                              | <b>Th-SINAP-201</b>                                                            | <b>Th-SINAP-202</b>                                                             | <b>Th-SINAP-203</b>                                                               |
|--------------------------------------------------------------------------------------|----------------------------------------------------------------------------------|--------------------------------------------------------------------------------|---------------------------------------------------------------------------------|-----------------------------------------------------------------------------------|
| CCDC No.                                                                             | 2065485                                                                          | 2065486                                                                        | 2065487                                                                         | 2065488                                                                           |
| formula                                                                              | C <sub>161</sub> H <sub>105</sub> N <sub>5</sub> O <sub>40</sub> Th <sub>6</sub> | C <sub>79</sub> H <sub>49</sub> N <sub>2</sub> O <sub>19</sub> Th <sub>3</sub> | C <sub>156</sub> H <sub>96</sub> N <sub>4</sub> O <sub>37</sub> Th <sub>6</sub> | C <sub>312</sub> H <sub>192</sub> N <sub>8</sub> O <sub>72</sub> Th <sub>12</sub> |
| formula weight                                                                       | 4140.73                                                                          | 2026.32                                                                        | 4010.60                                                                         | 7989.20                                                                           |
| habit                                                                                | block                                                                            | block                                                                          | block                                                                           | block                                                                             |
| space Group                                                                          | <i>P</i> -1                                                                      | <i>C</i> 2/ <i>m</i>                                                           | <i>C</i> 2/ <i>c</i>                                                            | <i>P</i> -1                                                                       |
| <i>a</i> (Å)                                                                         | 24.6432(12)                                                                      | 42.013(2)                                                                      | 48.68(3)                                                                        | 24.163(9)                                                                         |
| <i>b</i> (Å)                                                                         | 25.1083(12)                                                                      | 25.8483(14)                                                                    | 20.234(11)                                                                      | 26.423(9)                                                                         |
| <i>c</i> (Å)                                                                         | 25.5393(13)                                                                      | 26.0312(14)                                                                    | 43.14(2)                                                                        | 36.034(13)                                                                        |
| <i>α</i>                                                                             | 117.118(2)                                                                       | 90                                                                             | 90                                                                              | 93.359(10)                                                                        |
| <i>β</i>                                                                             | 114.422(2)                                                                       | 120.728(2)                                                                     | 109.987(16)                                                                     | 92.771(11)                                                                        |
| <i>γ</i>                                                                             | 91.982(2)                                                                        | 90                                                                             | 90                                                                              | 90.421(9)                                                                         |
| <i>V</i> (Å <sup>3</sup> )                                                           | 12312.2(11)                                                                      | 24300(2)                                                                       | 39938(38)                                                                       | 22939(14)                                                                         |
| <i>Z</i>                                                                             | 2                                                                                | 8                                                                              | 8                                                                               | 2                                                                                 |
| T (K)                                                                                | 120                                                                              | 120                                                                            | 120                                                                             | 120                                                                               |
| <i>λ</i> (Å)                                                                         | 0.71073                                                                          | 0.71073                                                                        | 0.71073                                                                         | 0.71073                                                                           |
| Max. 2 <i>θ</i> (°)                                                                  | 58.864                                                                           | 55.22                                                                          | 33.032                                                                          | 37.696                                                                            |
| <i>ρ</i> <sub>calcd</sub> (g cm <sup>-3</sup> )                                      | 1.117                                                                            | 1.108                                                                          | 1.334                                                                           | 1.157                                                                             |
| <i>μ</i> (mm <sup>-1</sup> )                                                         | 3.660                                                                            | 3.707                                                                          | 4.510                                                                           | 3.925                                                                             |
| <i>GoF</i> on F <sup>2</sup>                                                         | 1.027                                                                            | 1.054                                                                          | 1.467                                                                           | 1.169                                                                             |
| <i>R</i> <sub>1</sub> , <i>wR</i> <sub>2</sub> [ <i>I</i> > 2σ( <i>I</i> )]          | 0.0572, 0.1298                                                                   | 0.0476, 0.1235                                                                 | 0.2099, 0.5158                                                                  | 0.1935, 0.4924                                                                    |
| <i>R</i> <sub>1</sub> , <i>wR</i> <sub>2</sub> (all data)                            | 0.1080, 0.1563                                                                   | 0.0791, 0.1368                                                                 | 0.2508, 0.5659                                                                  | 0.3032, 0.5742                                                                    |
| ( <i>Δρ</i> ) <sub>max</sub> ,<br>( <i>Δρ</i> ) <sub>min</sub> /e (Å <sup>-3</sup> ) | 2.49, -4.76                                                                      | 1.52, -2.55                                                                    | 7.36, -2.10                                                                     | 4.35, -2.77                                                                       |

**Table S2** Limit of detection (LOD) based on different spectrometric methods and chemosensor toward iodate.

| Method Type           | Method or Material              | LOD ( $\mu\text{g}/\text{kg}$ ) | Reference |
|-----------------------|---------------------------------|---------------------------------|-----------|
| Spectrometric methods | ion chromatography              | 0.1                             | 1         |
|                       | ion chromatography              | 14.83                           | 2         |
|                       | GC-MS                           | 0.05                            | 3         |
|                       | LPME-GC-MS                      | 0.015                           | 4         |
|                       | HPLC                            | 0.2                             | 5         |
|                       | LC-MS/MS                        | 0.07                            | 6         |
|                       | ESI-MS                          | 0.0139 ng                       | 7         |
|                       | reverse flow injection analysis | 8                               | 8         |
| Chemosensor           | electrochemical sensor          | 6354                            | 9         |
|                       | electrochemical sensor          | 0.597                           | 10        |
|                       | AuNPs sensor                    | 8.7                             | 11        |
|                       | AuNPs sensor                    | 0.355                           | 12        |
|                       | amperometric sensor             | 1903.5                          | 13        |
|                       | amperometric sensor             | 105.5                           | 14        |
|                       | MWCTs amperometric sensor       | 317.3                           | 15        |
|                       | MWCTs amperometric sensor       | 126.9                           | 16        |
|                       | <b>Th-SINAP-200</b>             | 0.107                           | This work |

**Table S3** Quenching constants ( $K_{SV}$ ) of various cation and anion species.

|          |                 |                    |                    |                    |                  |                  |                  |                  |
|----------|-----------------|--------------------|--------------------|--------------------|------------------|------------------|------------------|------------------|
| Anion    | $\text{IO}_3^-$ | $\text{BO}_3^{3-}$ | $\text{SO}_4^{2-}$ | $\text{CO}_3^{2-}$ | $\text{F}^-$     | $\text{Cl}^-$    | $\text{HCO}_3^-$ | $\text{NO}_3^-$  |
| $K_{SV}$ | 41321.9         | 100.6              | 358.5              | 124.3              | 50.8             | 65.4             | 98.1             | 500.5            |
| Cation   | $\text{Na}^+$   | $\text{K}^+$       | $\text{Ba}^{2+}$   | $\text{Sr}^{2+}$   | $\text{Ca}^{2+}$ | $\text{Zn}^{2+}$ | $\text{Mg}^{2+}$ | $\text{Al}^{3+}$ |
| $K_{SV}$ | -24.9           | -96.5              | -187.5             | -18.3              | -37.2            | -124.9           | -24.8            | 45.6             |

**Table S4** Kinetic parameters of the pseudo-second-order model for iodate adsorption toward **Th-SINAP-200**.

| $q_0$<br>( $\text{mg}\cdot\text{g}^{-1}$ ) | Removal<br>(%) | Second-order kinetic model                 |                                                              |                                                              |        |
|--------------------------------------------|----------------|--------------------------------------------|--------------------------------------------------------------|--------------------------------------------------------------|--------|
|                                            |                | $q_e$<br>( $\text{mg}\cdot\text{g}^{-1}$ ) | $h$<br>( $\text{mg}\cdot\text{g}^{-1}\cdot\text{min}^{-1}$ ) | $k$<br>( $\text{g}\cdot\text{mg}^{-1}\cdot\text{min}^{-1}$ ) | $R^2$  |
| 10                                         | 45.18          | 3.126                                      | 3.3518                                                       | 0.343                                                        | 0.9912 |

**Table S5** Fitting results of the iodate sorption isotherms of **Th-SINAP-200** according to the Langmuir and Freundlich models.

| Langmuir                   |                            |        | Freundlich                                         |         |        |
|----------------------------|----------------------------|--------|----------------------------------------------------|---------|--------|
| $Q_m$<br>( $\text{mg/g}$ ) | $K_L$<br>( $\text{L/mg}$ ) | $R^2$  | $k_F$<br>( $\text{L}^n/\text{mol}^{n-1}\text{g}$ ) | $n$     | $R^2$  |
| 145.86593                  | 0.01034                    | 0.9802 | 6.36855                                            | 2.02926 | 0.9399 |

**Table S6** Torsion angles of biphenyl groups in TCBPA<sup>3-</sup> ligands of **Th-SINAP-200** and **Th-SINAP-203**.

| <b>Th-SINAP-200</b> |               | <b>Th-SINAP-203</b> |        |                    |        |
|---------------------|---------------|---------------------|--------|--------------------|--------|
| TCBPA <sup>3</sup>  | 26.63°        | TCBPA <sup>3</sup>  | 21.42° | TCBPA <sup>3</sup> | 19.43° |
| -                   | 37.26°        | -                   | 41.74° | -                  | 24.42° |
| (N1)                | 11.60°/11.47° | (N1)                | 15.61° | (N5)               | 18.32° |
| TCBPA <sup>3</sup>  | 32.67°        | TCBPA <sup>3</sup>  | 47.09° | TCBPA <sup>3</sup> | 5.96°  |
| -                   | 39.52°        | -                   | 33.59° | -                  | 33.33° |
| (N2)                | 17.18°/24.91° | (N2)                | 24.58° | (N6)               | 36.94° |
| TCBPA <sup>3</sup>  | 32.69°/20.90° | TCBPA <sup>3</sup>  | 30.54° | TCBPA <sup>3</sup> | 27.76° |
| -                   | 29.49°        | -                   | 17.87° | -                  | 38.81° |
| (N3)                | 33.90°        | (N3)                | 44.66° | (N7)               | 28.68° |
| TCBPA <sup>3</sup>  | 7.93°/22.11°  | TCBPA <sup>3</sup>  | 28.28° | TCBPA <sup>3</sup> | 42.16° |
| -                   | 33.69°/27.04° | -                   | 15.43° | -                  | 13.48° |
| (N4)                | 36.71°/11.26° | (N4)                | 16.56° | (N8)               | 19.42° |

## References

1. Y. Bichsel and U. von Gunten, *Anal. Chem.*, 1999, **71**, 34.
2. Z. Huang, Z. Zhu, Q. Subhani, W. Yan, W. Guo and Y. Zhu, *J. Chromatogr. A*, 2012, **1251**, 154.
3. H. S. Shin, Y. S. OhShin, J. H. Kim and J. K. Ryu, *J. Chromatogr. A*, 1996, **732**, 327.
4. K. Reddy-Noone, A. Jain and K. K. Verma, *J. Chromatogr. A*, 2007, **1148**, 145.
5. K. A. Schwehr and P. H. Santschi, *Anal. Chim. Acta*, 2003, **482**, 59.
6. S. A. Snyder, B. J. Vanderford and D. J. Rexing, *Environ. Sci. Technol.*, 2005, **39**, 4586.
7. R. J. Soukup-Hein, J. W. Remsburg, P. K. Dasgupta and D. W. Armstrong, *Anal. Chem.*, 2007, **79**, 7346.
8. Z. H. Xie and J. C. Zhao, *Talanta*, 2004, **63**, 339.
9. X. Huang, Y. Li, Y. Chen and L. Wang, *Sens. Actuators B Chem.*, 2008, **134**, 780.
10. M. Sharifi, S. Dianat and A. Hosseini, *RSC Adv.*, 2021, **11**, 8993.
11. Y.-M. Chen, T.-L. Cheng and W.-L. Tseng, *Analyst*, 2009, **134**, 2106.
12. R. Li, P. Xu, J. Fan, J. Di, Y. Tu and J. Yan, *Anal. Chim. Acta*, 2014, **827**, 80.
13. B. Haghghi, H. Hamidi and L. Gorton, *Electrochim. Acta*, 2010, **55**, 4750.
14. Y. C. Li, W. F. Bu, L. X. Wu and C. Q. Sun, *Sens. Actuators B Chem.*, 2005, **107**, 921.
15. A. Salimi, H. MamKhezri, R. Hallaj and S. Zandi, *Electrochim. Acta*, 2007, **52**, 6097.
16. A. Salimi, A. Noorbakhsh and M. Ghadermarzi, *Sens. Actuators B Chem.*, 2007, **123**, 530.
